# Supplementary material for: Burden of lymphoma in China, 2006–2016: an analysis of the Global Burden of Disease Study 2016
Source: Springer Nature journal article supplement (doi:10.1186/s13045-019-0785-7), 2019-11-19
Supplement: MOESM1 [file 17406232]

Table S1 Age-standardized incidence rates of lymphoma by age and sex in 2016 (per 100,000

population)

| Age groups<br>(year) | Hodgkin lymphoma    |                     |                     | Non-Hodgkin lymphoma |                     |                     |
|----------------------|---------------------|---------------------|---------------------|----------------------|---------------------|---------------------|
|                      | Both                | Male                | Female              | Both                 | Male                | Female              |
| 0                    | 0.28<br>(0.16–0.40) | 0.31<br>(0.18–0.48) | 0.25<br>(0.10–0.39) | 0.00                 | 0.00                | 0.00                |
| 1–                   | 0.22<br>(0.13–0.31) | 0.24<br>(0.15–0.38) | 0.19<br>(0.10–0.28) | 1.26<br>(1.05–1.42)  | 1.34<br>(1.06–1.60) | 1.17<br>(0.93–1.39) |
| 5–                   | 0.19<br>(0.13–0.27) | 0.25<br>(0.15–0.41) | 0.12<br>(0.07–0.16) | 0.82<br>(0.68–0.93)  | 0.96<br>(0.75–1.12) | 0.66<br>(0.54–0.77) |
| 10–                  | 0.15<br>(0.11–0.23) | 0.20<br>(0.12–0.35) | 0.10<br>(0.07–0.13) | 0.80<br>(0.68–0.89)  | 0.90<br>(0.76–1.06) | 0.67<br>(0.54–0.78) |
| 15–                  | 0.22<br>(0.16–0.32) | 0.27<br>(0.16–0.45) | 0.17<br>(0.12–0.26) | 0.87<br>(0.77–1.00)  | 1.04<br>(0.92–1.24) | 0.68<br>(0.56–0.83) |
| 20–                  | 0.36<br>(0.27–0.53) | 0.44<br>(0.27–0.74) | 0.27<br>(0.20–0.41) | 0.98<br>(0.84–1.07)  | 1.18<br>(0.98–1.32) | 0.75<br>(0.63–0.90) |
| 25–                  | 0.32<br>(0.24–0.45) | 0.38<br>(0.24–0.63) | 0.26<br>(0.18–0.38) | 1.23<br>(1.03–1.34)  | 1.42<br>(1.13–1.60) | 1.02<br>(0.87–1.16) |
| 30–                  | 0.33<br>(0.24–0.47) | 0.42<br>(0.26–0.67) | 0.23<br>(0.16–0.33) | 1.80<br>(1.49–1.97)  | 2.06<br>(1.61–2.31) | 1.53<br>(1.28–1.76) |
| 35–                  | 0.26<br>(0.20–0.38) | 0.32<br>(0.22–0.52) | 0.19<br>(0.14–0.30) | 2.22<br>(1.86–2.45)  | 2.58<br>(2.04–2.93) | 1.85<br>(1.48–2.16) |

|     |                     |                     |                     |                        |                        |                        |
|-----|---------------------|---------------------|---------------------|------------------------|------------------------|------------------------|
| 40- | 0.29<br>(0.21-0.39) | 0.37<br>(0.25-0.58) | 0.19<br>(0.14-0.28) | 3.29<br>(2.76-3.62)    | 4.06<br>(3.22-4.58)    | 2.49<br>(2.06-2.89)    |
| 45- | 0.45<br>(0.33-0.62) | 0.65<br>(0.44-1.00) | 0.24<br>(0.16-0.33) | 5.62<br>(4.45-6.20)    | 7.35<br>(5.27-8.38)    | 3.84<br>(3.35-4.34)    |
| 50- | 0.69<br>(0.50-0.93) | 0.98<br>(0.65-1.47) | 0.38<br>(0.23-0.53) | 8.21<br>(6.52-8.98)    | 10.63<br>(7.67-11.86)  | 5.72<br>(4.83-6.41)    |
| 55- | 0.85<br>(0.61-1.14) | 1.32<br>(0.87-1.88) | 0.37<br>(0.24-0.53) | 10.37<br>(8.05-11.32)  | 13.72<br>(9.77-15.34)  | 6.91<br>(5.77-7.64)    |
| 60- | 1.20<br>(0.85-1.64) | 1.92<br>(1.25-2.75) | 0.47<br>(0.30-0.68) | 12.61<br>(10.10-13.71) | 15.85<br>(11.42-17.66) | 9.32<br>(8.04-10.30)   |
| 65- | 1.28<br>(0.95-1.68) | 2.00<br>(1.36-2.79) | 0.57<br>(0.40-0.90) | 14.62<br>(11.45-15.93) | 19.09<br>(13.58-21.32) | 10.22<br>(8.62-11.26)  |
| 70- | 1.33<br>(0.97-1.79) | 2.07<br>(1.41-2.95) | 0.60<br>(0.44-0.91) | 16.78<br>(13.49-18.14) | 21.48<br>(15.91-23.64) | 12.18<br>(10.24-13.58) |
| 75- | 1.25<br>(0.90-1.56) | 1.80<br>(1.20-2.36) | 0.74<br>(0.51-1.08) | 16.00<br>(13.50-17.22) | 20.03<br>(15.55-22.03) | 12.27<br>(10.53-13.51) |
| 80- | 1.12<br>(0.80-1.43) | 1.53<br>(0.97-2.04) | 0.78<br>(0.49-1.14) | 14.11<br>(11.89-15.31) | 17.65<br>(13.56-19.61) | 11.08<br>(9.52-12.12)  |
| 85- | 1.14<br>(0.84-1.50) | 1.69<br>(1.15-2.27) | 0.77<br>(0.50-1.17) | 15.18<br>(13.25-16.43) | 19.39<br>(15.04-21.94) | 12.36<br>(10.81-13.43) |
| 90- | 1.05<br>(0.68-1.29) | 1.63<br>(0.98-2.18) | 0.78<br>(0.43-1.05) | 17.14<br>(15.73-18.88) | 21.22<br>(17.39-25.16) | 15.12<br>(13.39-16.68) |

|     |             |             |             |               |               |               |
|-----|-------------|-------------|-------------|---------------|---------------|---------------|
| 95- | 1.20        | 1.95        | 0.76        | 21.02         | 28.13         | 18.55         |
|     | (0.75-1.46) | (1.16-2.57) | (0.50-1.22) | (19.12-23.14) | (22.29-33.86) | (15.86-20.33) |

---

Data in parentheses are 95% uncertainty intervals.

Table S2 Age-standardized mortality rates of lymphoma by age and sex in 2016 (per 100,000

population)

| Age groups<br>(year) | Hodgkin lymphoma    |                     |                     | Non-Hodgkin lymphoma |                     |                     |
|----------------------|---------------------|---------------------|---------------------|----------------------|---------------------|---------------------|
|                      | Both                | Male                | Female              | Both                 | Male                | Female              |
| 0                    | 0.05<br>(0.04–0.07) | 0.07<br>(0.05–0.09) | 0.04<br>(0.02–0.05) | 0.70<br>(0.57–0.83)  | 0.73<br>(0.55–0.88) | 0.67<br>(0.53–0.92) |
| 1–                   | 0.03<br>(0.02–0.04) | 0.04<br>(0.03–0.06) | 0.02<br>(0.01–0.03) | 0.42<br>(0.35–0.52)  | 0.47<br>(0.38–0.59) | 0.36<br>(0.29–0.48) |
| 5–                   | 0.03<br>(0.03–0.05) | 0.05<br>(0.04–0.07) | 0.02<br>(0.01–0.02) | 0.32<br>(0.27–0.37)  | 0.39<br>(0.32–0.47) | 0.24<br>(0.20–0.29) |
| 10–                  | 0.03<br>(0.03–0.05) | 0.05<br>(0.04–0.07) | 0.02<br>(0.01–0.03) | 0.36<br>(0.32–0.41)  | 0.43<br>(0.37–0.51) | 0.28<br>(0.24–0.34) |
| 15–                  | 0.05<br>(0.04–0.07) | 0.06<br>(0.05–0.10) | 0.03<br>(0.02–0.05) | 0.41<br>(0.36–0.47)  | 0.51<br>(0.45–0.61) | 0.29<br>(0.24–0.36) |
| 20–                  | 0.06<br>(0.05–0.09) | 0.08<br>(0.06–0.12) | 0.04<br>(0.03–0.06) | 0.54<br>(0.46–0.61)  | 0.67<br>(0.55–0.76) | 0.39<br>(0.32–0.49) |
| 25–                  | 0.07<br>(0.06–0.10) | 0.09<br>(0.07–0.13) | 0.05<br>(0.04–0.08) | 0.61<br>(0.51–0.67)  | 0.72<br>(0.57–0.82) | 0.48<br>(0.42–0.56) |
| 30–                  | 0.09<br>(0.07–0.12) | 0.12<br>(0.08–0.17) | 0.05<br>(0.04–0.08) | 0.70<br>(0.58–0.77)  | 0.85<br>(0.66–0.94) | 0.54<br>(0.47–0.64) |
| 35–                  | 0.08<br>(0.07–0.11) | 0.11<br>(0.08–0.16) | 0.06<br>(0.04–0.09) | 0.85<br>(0.72–0.94)  | 1.05<br>(0.84–1.17) | 0.65<br>(0.54–0.77) |

|     |                     |                     |                     |                        |                        |                        |
|-----|---------------------|---------------------|---------------------|------------------------|------------------------|------------------------|
| 40- | 0.11<br>(0.09–0.15) | 0.14<br>(0.11–0.22) | 0.07<br>(0.05–0.11) | 1.30<br>(1.09–1.44)    | 1.70<br>(1.34–1.93)    | 0.89<br>(0.75–1.03)    |
| 45- | 0.16<br>(0.14–0.23) | 0.23<br>(0.18–0.35) | 0.09<br>(0.06–0.13) | 2.19<br>(1.70–2.41)    | 3.05<br>(2.15–3.46)    | 1.30<br>(1.15–1.46)    |
| 50- | 0.24<br>(0.19–0.33) | 0.32<br>(0.24–0.46) | 0.16<br>(0.10–0.24) | 3.41<br>(2.63–3.76)    | 4.78<br>(3.37–5.36)    | 2.00<br>(1.73–2.25)    |
| 55- | 0.35<br>(0.27–0.46) | 0.50<br>(0.37–0.69) | 0.20<br>(0.14–0.30) | 5.04<br>(3.84–5.57)    | 7.14<br>(4.98–8.03)    | 2.87<br>(2.43–3.20)    |
| 60- | 0.53<br>(0.42–0.70) | 0.75<br>(0.53–1.05) | 0.29<br>(0.19–0.44) | 6.91<br>(5.47–7.57)    | 9.25<br>(6.76–10.33)   | 4.53<br>(3.95–5.04)    |
| 65- | 0.72<br>(0.58–0.97) | 1.02<br>(0.74–1.42) | 0.43<br>(0.31–0.69) | 9.59<br>(7.54–10.50)   | 13.06<br>(9.24–14.57)  | 6.17<br>(5.28–6.86)    |
| 70- | 0.91<br>(0.70–1.23) | 1.31<br>(0.94–1.94) | 0.52<br>(0.38–0.80) | 12.10<br>(9.73–13.14)  | 16.17<br>(12.03–17.82) | 8.12<br>(6.95–9.15)    |
| 75- | 0.94<br>(0.70–1.19) | 1.23<br>(0.83–1.63) | 0.66<br>(0.47–0.99) | 13.01<br>(10.94–14.11) | 17.18<br>(13.65–19.02) | 9.17<br>(7.94–10.20)   |
| 80- | 1.10<br>(0.81–1.44) | 1.41<br>(0.91–1.90) | 0.84<br>(0.53–1.23) | 14.09<br>(11.83–15.48) | 18.66<br>(14.56–21.10) | 10.16<br>(8.78–11.29)  |
| 85- | 1.09<br>(0.83–1.45) | 1.50<br>(1.04–2.06) | 0.83<br>(0.54–1.25) | 14.61<br>(12.61–16.08) | 19.97<br>(15.54–22.79) | 11.02<br>(9.66–12.13)  |
| 90- | 0.98<br>(0.68–1.23) | 1.37<br>(0.89–1.87) | 0.78<br>(0.45–1.07) | 15.61<br>(14.20–17.52) | 21.04<br>(17.58–25.32) | 12.92<br>(11.47–14.23) |

|     |             |             |             |               |               |               |
|-----|-------------|-------------|-------------|---------------|---------------|---------------|
| 95- | 1.14        | 1.62        | 0.97        | 18.85         | 27.89         | 15.72         |
|     | (0.72-1.37) | (1.01-2.05) | (0.53-1.27) | (17.21-21.19) | (22.80-34.36) | (13.77-17.44) |

---

Data in parentheses are 95% uncertainty intervals.

Table S3 Age-standardized incidence, mortality and prevalence rates of lymphoma by province of China in 2016 (per 100,000 population)

| Province  | Hodgkin lymphoma    |                     |                     | Non-Hodgkin lymphoma |                     |                        |
|-----------|---------------------|---------------------|---------------------|----------------------|---------------------|------------------------|
|           | Incidence           | Mortality           | Prevalence          | Incidence            | Mortality           | Prevalence             |
| Anhui     | 0.34<br>(0.24–0.45) | 0.22<br>(0.16–0.28) | 1.07<br>(0.74–1.51) | 5.10<br>(3.44–5.89)  | 3.00<br>(2.08–3.57) | 17.38<br>(11.37–20.38) |
| Beijing   | 0.77<br>(0.53–1.01) | 0.11<br>(0.07–0.13) | 3.50<br>(2.39–4.68) | 7.55<br>(6.46–8.30)  | 2.49<br>(1.93–2.93) | 30.31<br>(25.90–33.50) |
| Chongqing | 0.32<br>(0.23–0.56) | 0.16<br>(0.12–0.26) | 1.16<br>(0.77–2.11) | 3.07<br>(2.81–3.33)  | 2.17<br>(1.87–2.51) | 9.86<br>(8.98–10.72)   |
| Fujian    | 0.46<br>(0.29–0.67) | 0.18<br>(0.13–0.22) | 1.75<br>(1.05–2.71) | 3.91<br>(3.24–4.35)  | 2.42<br>(2.00–2.81) | 13.26<br>(10.76–14.83) |
| Gansu     | 0.24<br>(0.18–0.43) | 0.18<br>(0.13–0.32) | 0.73<br>(0.52–1.30) | 2.51<br>(2.18–2.73)  | 2.17<br>(1.87–2.51) | 7.21<br>(6.12–7.91)    |
| Guangdong | 0.55<br>(0.39–0.83) | 0.14<br>(0.12–0.19) | 2.30<br>(1.56–3.57) | 5.72<br>(5.17–6.80)  | 2.06<br>(1.76–2.53) | 22.43<br>(20.19–26.53) |
| Guangxi   | 0.45<br>(0.34–0.66) | 0.24<br>(0.19–0.33) | 1.58<br>(1.12–2.50) | 3.48<br>(2.77–3.87)  | 2.51<br>(2.04–2.92) | 10.98<br>(8.65–12.29)  |
| Guizhou   | 0.24<br>(0.15–0.52) | 0.20<br>(0.12–0.45) | 0.70<br>(0.43–1.46) | 2.81<br>(2.19–3.12)  | 2.58<br>(2.11–3.03) | 7.86<br>(5.89–8.76)    |
| Hainan    | 0.33<br>(0.21–0.64) | 0.15<br>(0.10–0.29) | 1.24<br>(0.73–2.44) | 3.04<br>(2.79–3.48)  | 2.06<br>(1.78–2.52) | 9.99<br>(9.11–11.18)   |

|                |                     |                     |                     |                     |                     |                        |
|----------------|---------------------|---------------------|---------------------|---------------------|---------------------|------------------------|
| Hebei          | 0.56<br>(0.34–0.81) | 0.24<br>(0.15–0.29) | 2.12<br>(1.24–3.26) | 3.78<br>(3.05–4.20) | 2.40<br>(1.86–2.80) | 12.58<br>(10.04–14.04) |
| Heilongjiang   | 0.40<br>(0.29–0.64) | 0.19<br>(0.15–0.27) | 1.47<br>(1.02–2.40) | 3.25<br>(2.95–3.71) | 2.26<br>(1.95–2.60) | 10.51<br>(9.42–11.75)  |
| Henan          | 0.46<br>(0.32–0.68) | 0.22<br>(0.17–0.28) | 1.67<br>(1.10–2.65) | 3.26<br>(2.86–3.65) | 2.22<br>(1.89–2.57) | 10.48<br>(9.17–11.59)  |
| Hubei          | 0.44<br>(0.30–0.62) | 0.21<br>(0.16–0.26) | 1.58<br>(1.03–2.42) | 5.14<br>(4.24–5.63) | 2.56<br>(2.12–2.92) | 18.57<br>(15.15–20.53) |
| Hunan          | 0.33<br>(0.23–0.56) | 0.17<br>(0.13–0.28) | 1.18<br>(0.78–2.10) | 4.16<br>(2.93–4.73) | 2.96<br>(2.10–3.46) | 13.25<br>(9.04–15.17)  |
| Inner Mongolia | 0.36<br>(0.24–0.68) | 0.14<br>(0.11–0.24) | 1.38<br>(0.86–2.73) | 3.91<br>(3.24–4.33) | 2.46<br>(1.98–2.89) | 13.20<br>(10.83–14.65) |
| Jiangsu        | 0.61<br>(0.29–0.95) | 0.19<br>(0.09–0.25) | 2.51<br>(1.14–4.13) | 4.91<br>(4.00–5.42) | 2.52<br>(1.97–2.94) | 17.72<br>(14.34–19.68) |
| Jiangxi        | 0.34<br>(0.26–0.50) | 0.22<br>(0.17–0.28) | 1.14<br>(0.81–1.75) | 3.16<br>(2.47–3.50) | 2.53<br>(2.01–2.92) | 9.63<br>(7.35–10.75)   |
| Jilin          | 0.40<br>(0.29–0.60) | 0.18<br>(0.15–0.25) | 1.49<br>(1.01–2.38) | 3.60<br>(2.92–3.96) | 2.40<br>(1.89–2.79) | 11.83<br>(9.61–13.07)  |
| Liaoning       | 0.57<br>(0.32–0.87) | 0.20<br>(0.12–0.25) | 2.26<br>(1.21–3.66) | 6.27<br>(4.94–7.02) | 2.70<br>(2.05–3.16) | 23.72<br>(18.73–26.72) |
| Ningxia        | 0.27<br>(0.19–0.47) | 0.17<br>(0.12–0.29) | 0.90<br>(0.61–1.59) | 2.81<br>(2.58–3.04) | 2.23<br>(1.93–2.57) | 8.56<br>(7.67–9.25)    |



|          |                     |                     |                     |                     |                     |                        |
|----------|---------------------|---------------------|---------------------|---------------------|---------------------|------------------------|
| Qinghai  | 0.31<br>(0.19–0.69) | 0.22<br>(0.13–0.48) | 0.99<br>(0.57–2.19) | 3.05<br>(2.54–3.33) | 2.60<br>(2.18–3.01) | 8.90<br>(7.25–9.73)    |
| Shaanxi  | 0.32<br>(0.22–0.56) | 0.16<br>(0.12–0.28) | 1.14<br>(0.74–2.11) | 2.91<br>(2.66–3.22) | 2.10<br>(1.80–2.45) | 9.26<br>(8.41–10.12)   |
| Shandong | 0.56<br>(0.34–0.83) | 0.19<br>(0.13–0.23) | 2.21<br>(1.30–3.41) | 4.18<br>(3.57–4.60) | 2.27<br>(1.86–2.63) | 14.73<br>(12.60–16.34) |
| Shanghai | 0.66<br>(0.45–0.93) | 0.10<br>(0.07–0.12) | 2.95<br>(1.99–4.27) | 8.36<br>(6.04–9.40) | 2.84<br>(1.98–3.38) | 33.47<br>(24.10–37.84) |
| Shanxi   | 0.33<br>(0.23–0.57) | 0.15<br>(0.12–0.26) | 1.22<br>(0.80–2.16) | 3.56<br>(3.10–3.87) | 2.41<br>(2.01–2.79) | 11.57<br>(9.94–12.66)  |
| Sichuan  | 0.37<br>(0.29–0.54) | 0.22<br>(0.18–0.31) | 1.25<br>(0.92–1.96) | 3.33<br>(2.73–3.65) | 2.55<br>(2.10–2.98) | 10.20<br>(8.21–11.27)  |
| Tianjin  | 0.69<br>(0.47–1.02) | 0.13<br>(0.10–0.17) | 3.02<br>(2.03–4.55) | 7.57<br>(6.45–8.39) | 2.74<br>(2.20–3.19) | 29.92<br>(25.51–33.30) |
| Tibet    | 0.36<br>(0.24–0.74) | 0.33<br>(0.21–0.69) | 1.00<br>(0.68–2.03) | 3.48<br>(2.32–4.00) | 3.49<br>(2.34–4.22) | 9.65<br>(6.18–11.20)   |
| Xinjiang | 0.52<br>(0.35–0.95) | 0.24<br>(0.18–0.39) | 1.94<br>(1.22–3.70) | 3.25<br>(2.94–4.13) | 2.25<br>(1.92–2.84) | 10.62<br>(9.55–13.27)  |
| Yunnan   | 0.31<br>(0.23–0.55) | 0.22<br>(0.16–0.40) | 0.96<br>(0.69–1.71) | 2.71<br>(2.31–2.96) | 2.31<br>(1.98–2.68) | 7.87<br>(6.62–8.62)    |
| Zhejiang | 0.60<br>(0.27–0.97) | 0.19<br>(0.10–0.25) | 2.44<br>(1.06–4.18) | 5.27<br>(4.61–5.79) | 2.14<br>(1.80–2.50) | 20.18<br>(17.56–22.28) |

|            |             |             |             |             |             |               |
|------------|-------------|-------------|-------------|-------------|-------------|---------------|
| Hong Kong* | 0.45        | 0.09        | 1.96        | 7.78        | 3.43        | 29.47         |
|            | (0.32–0.62) | (0.07–0.12) | (1.36–2.77) | (4.85–8.98) | (2.20–4.08) | (18.67–34.03) |
| Macao*     | 0.32        | 0.06        | 1.43        | 5.22        | 2.21        | 19.68         |
|            | (0.21–0.63) | (0.04–0.11) | (0.91–2.81) | (3.44–6.45) | (1.42–2.77) | (13.08–24.60) |

---

\*special administrative regions.

Data in parentheses are 95% uncertainty intervals.

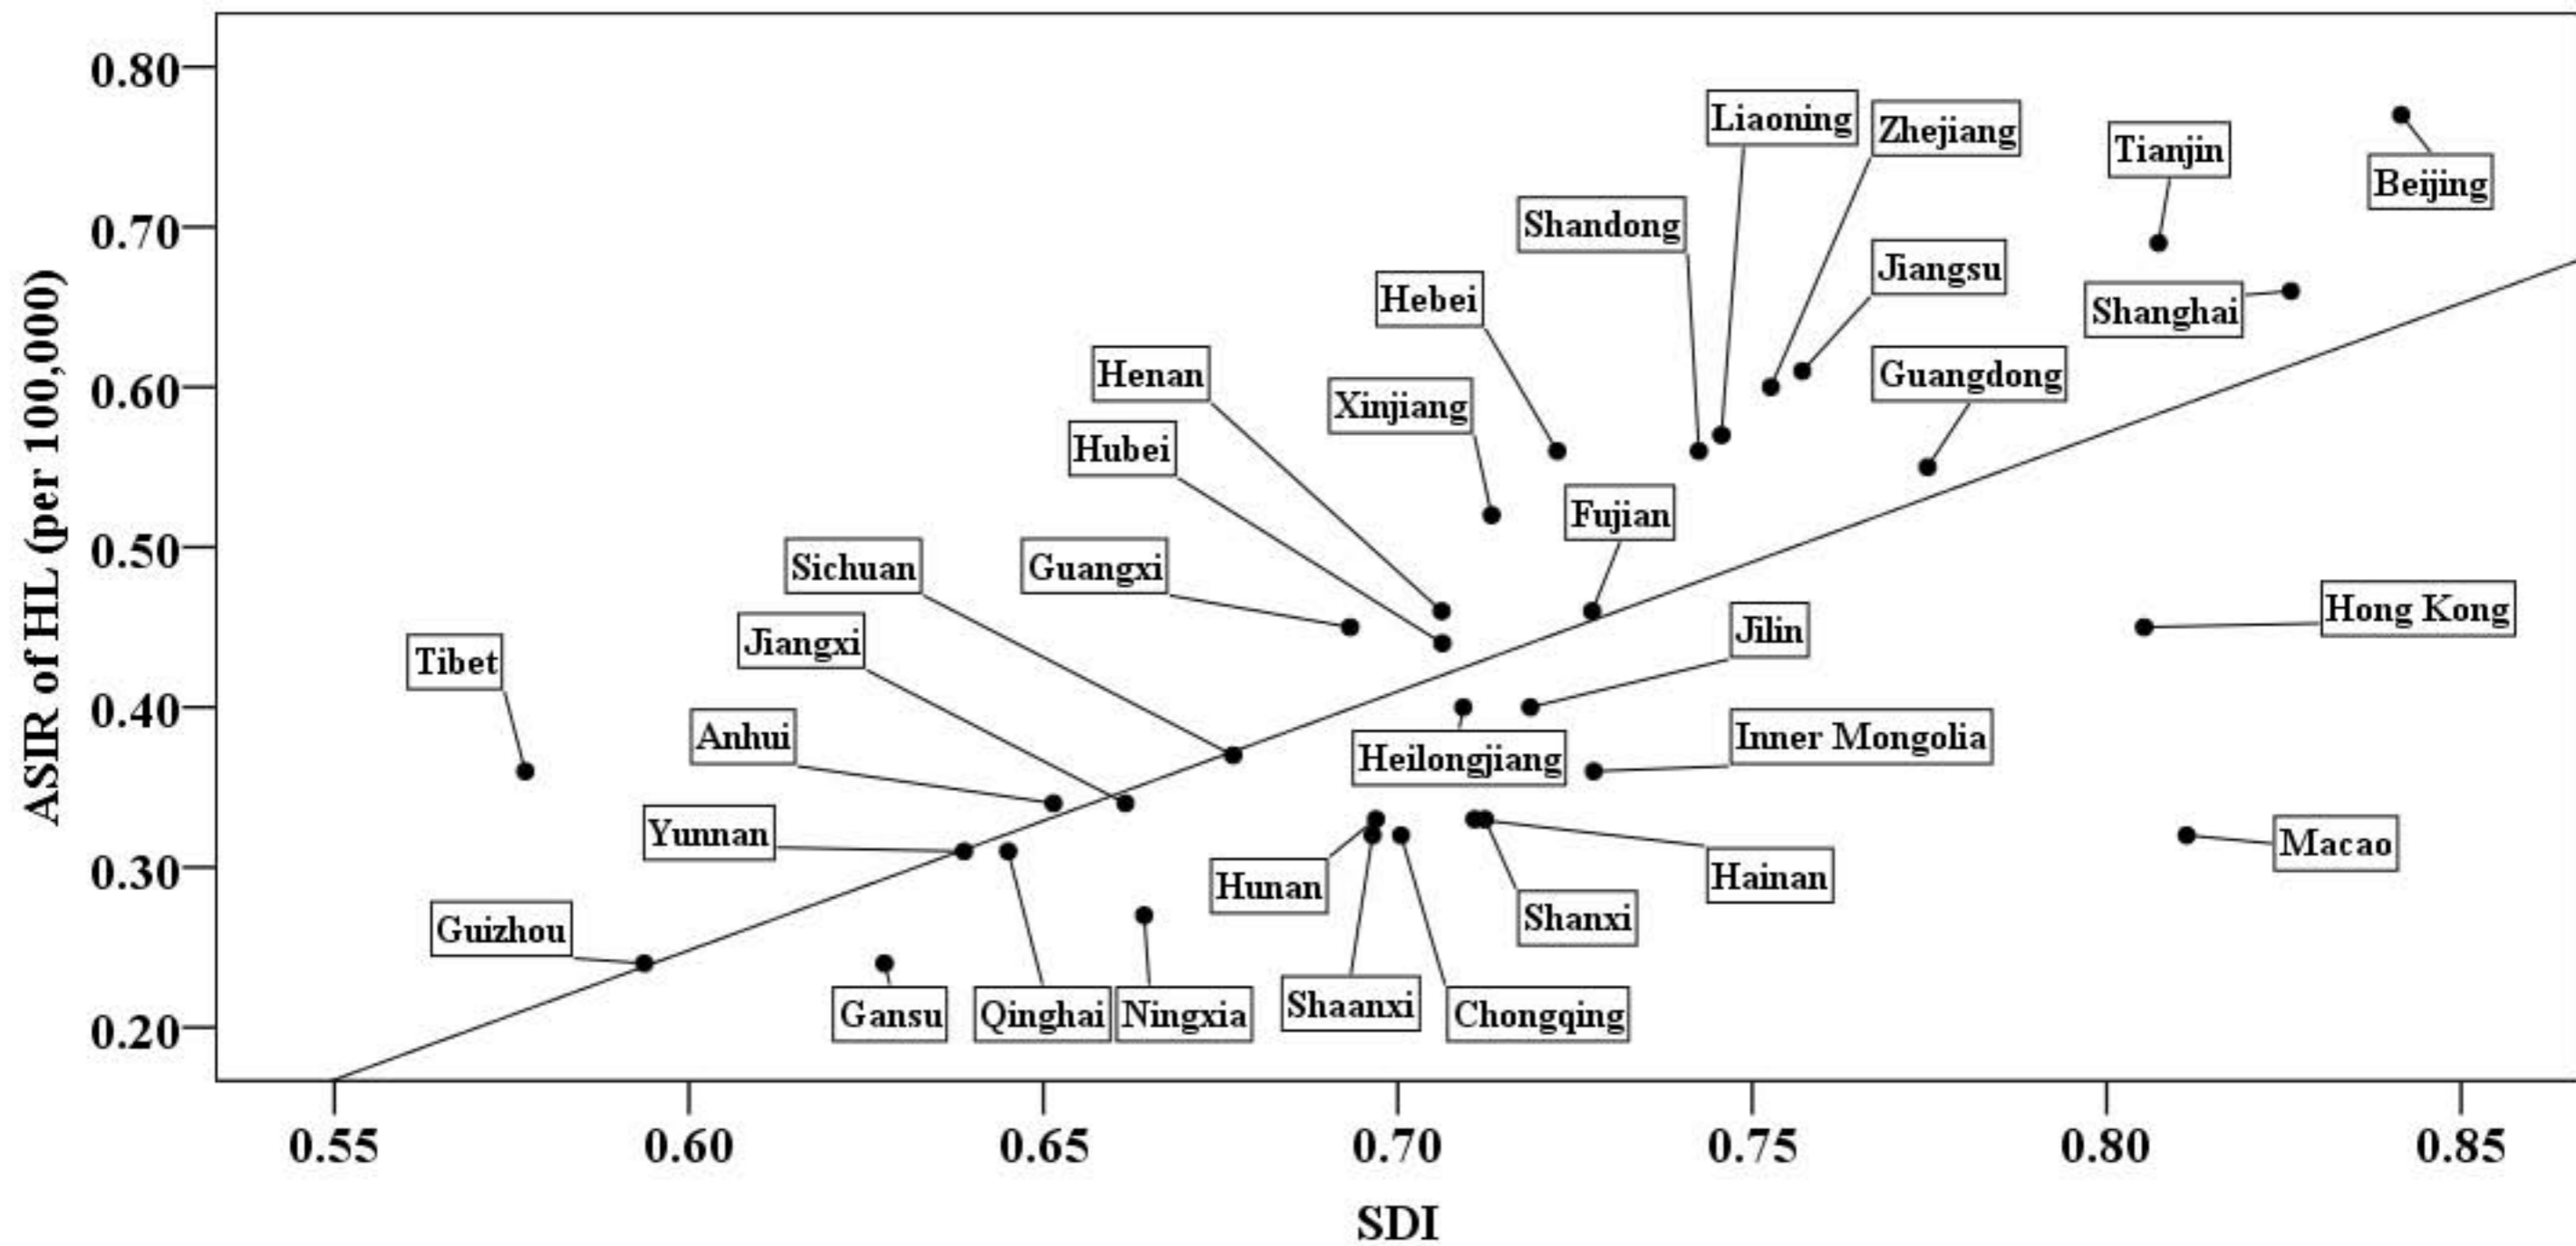

(A)



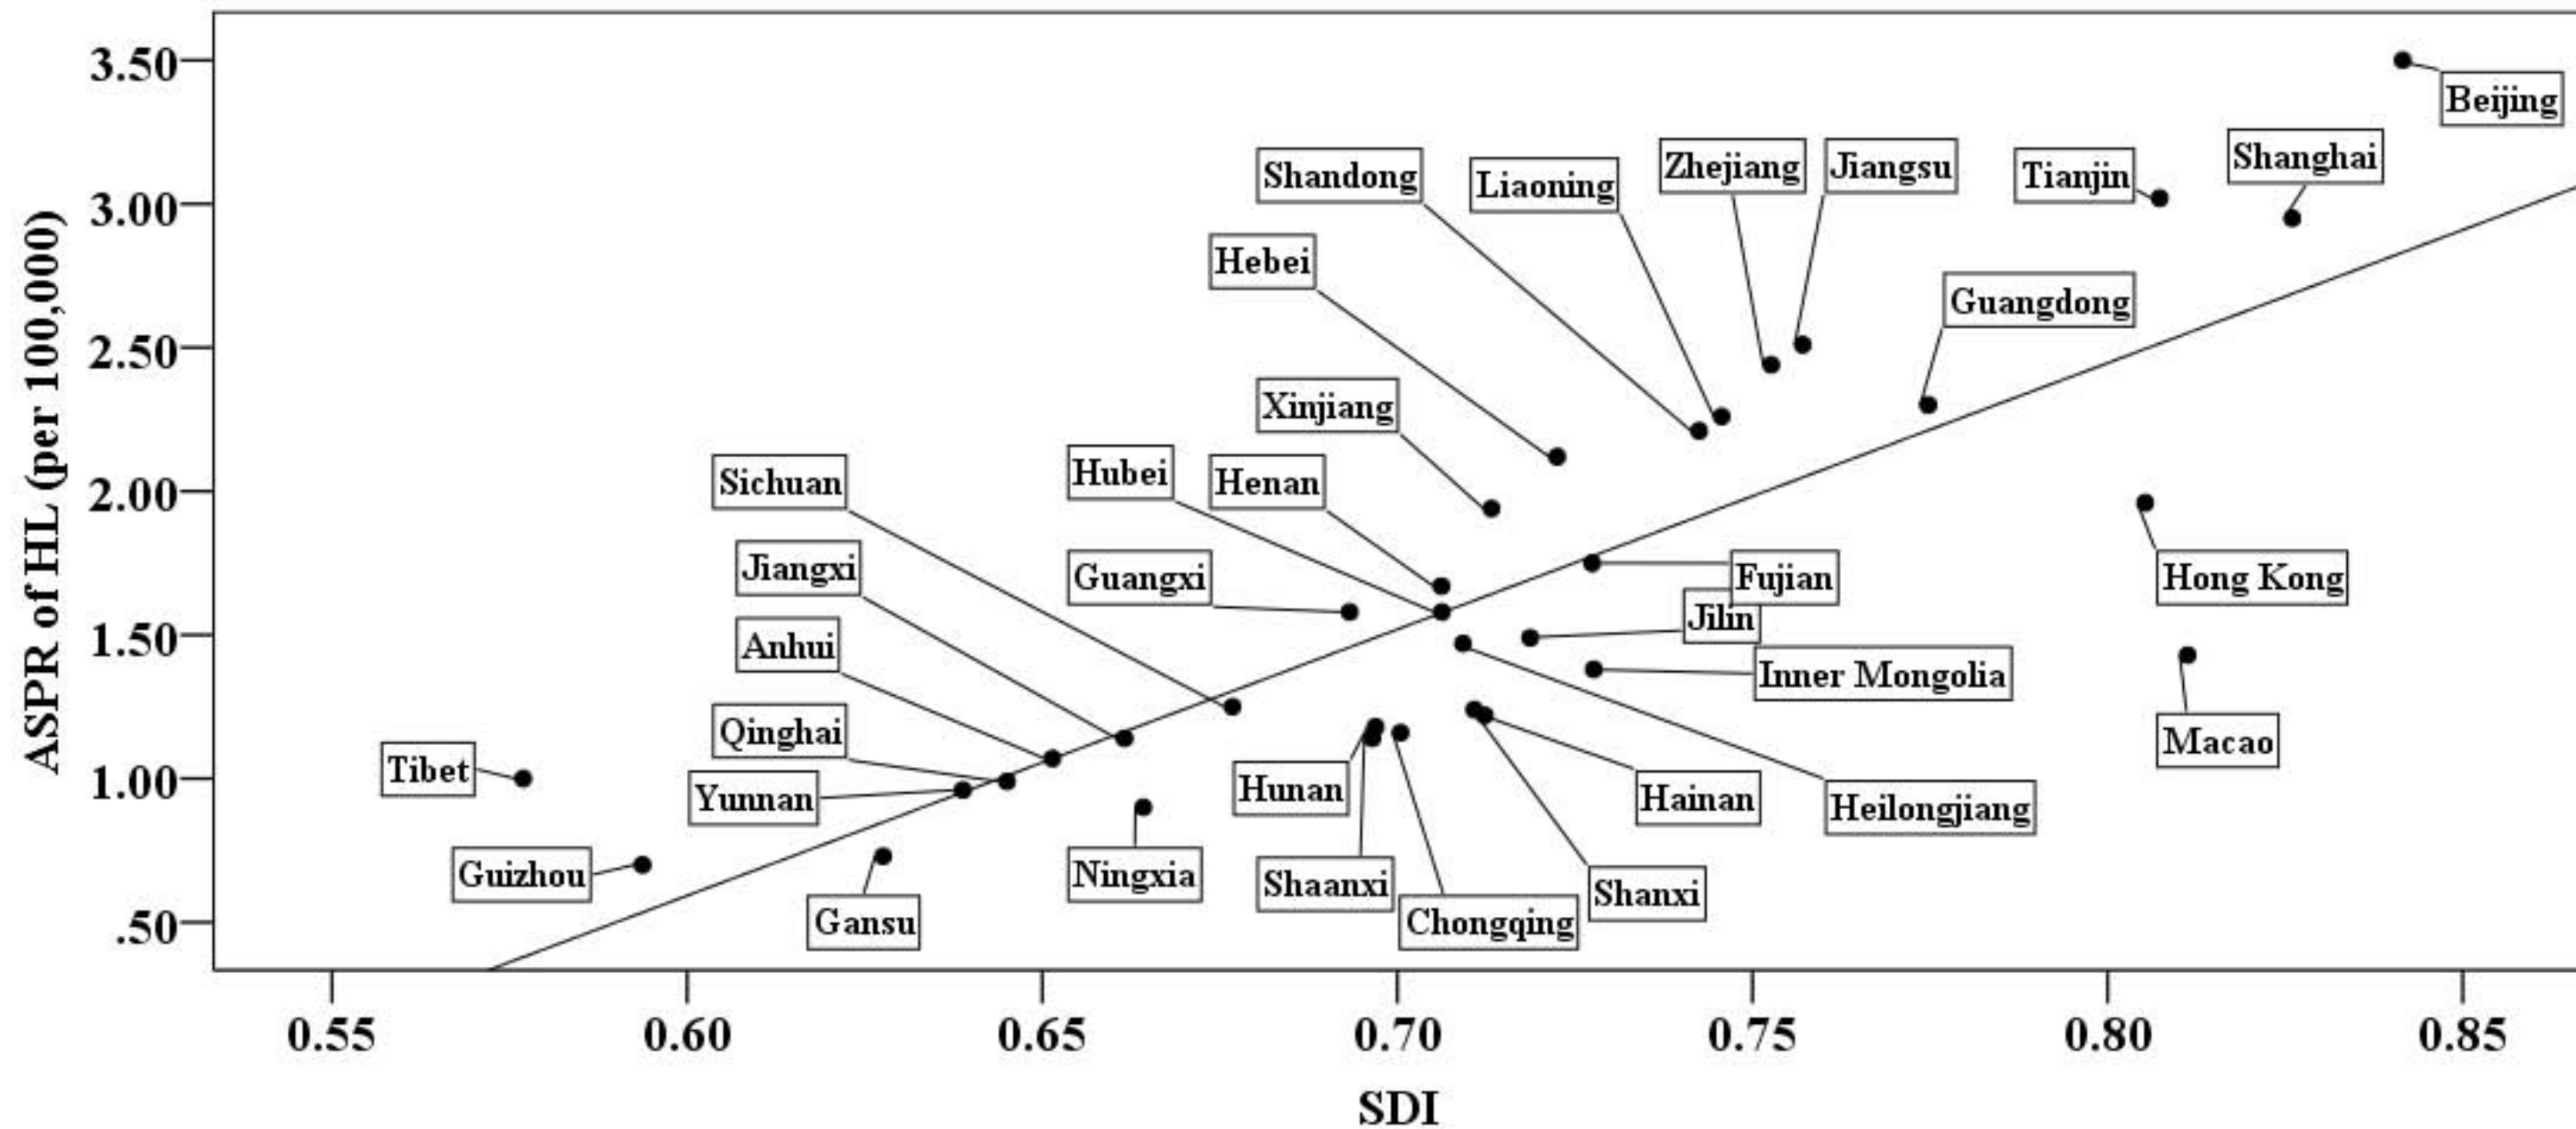

(C)

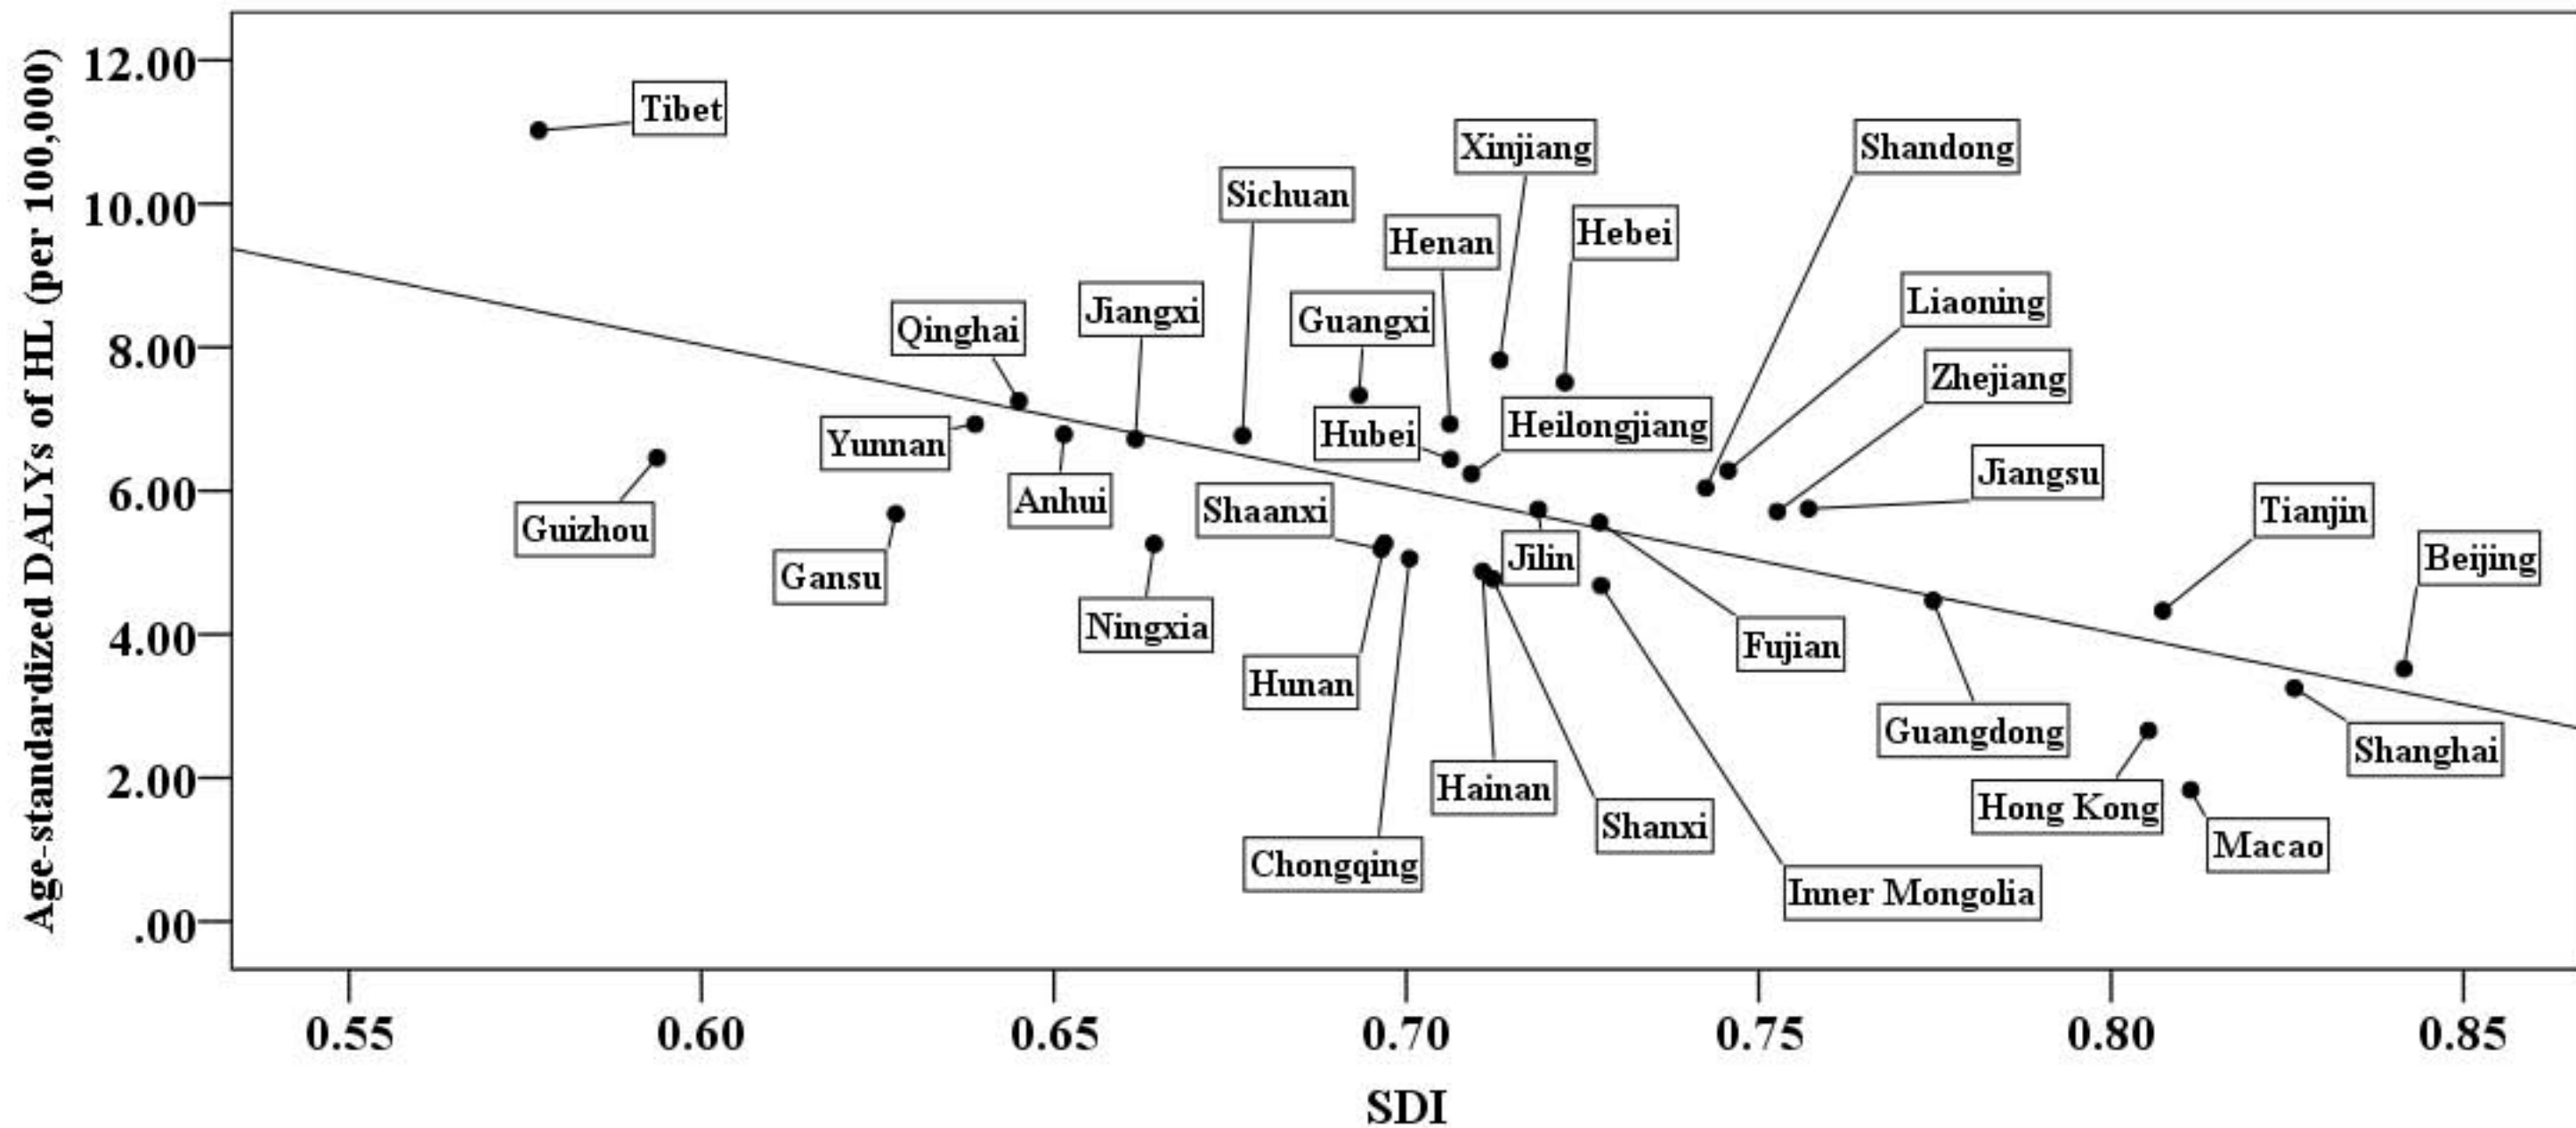

(D)

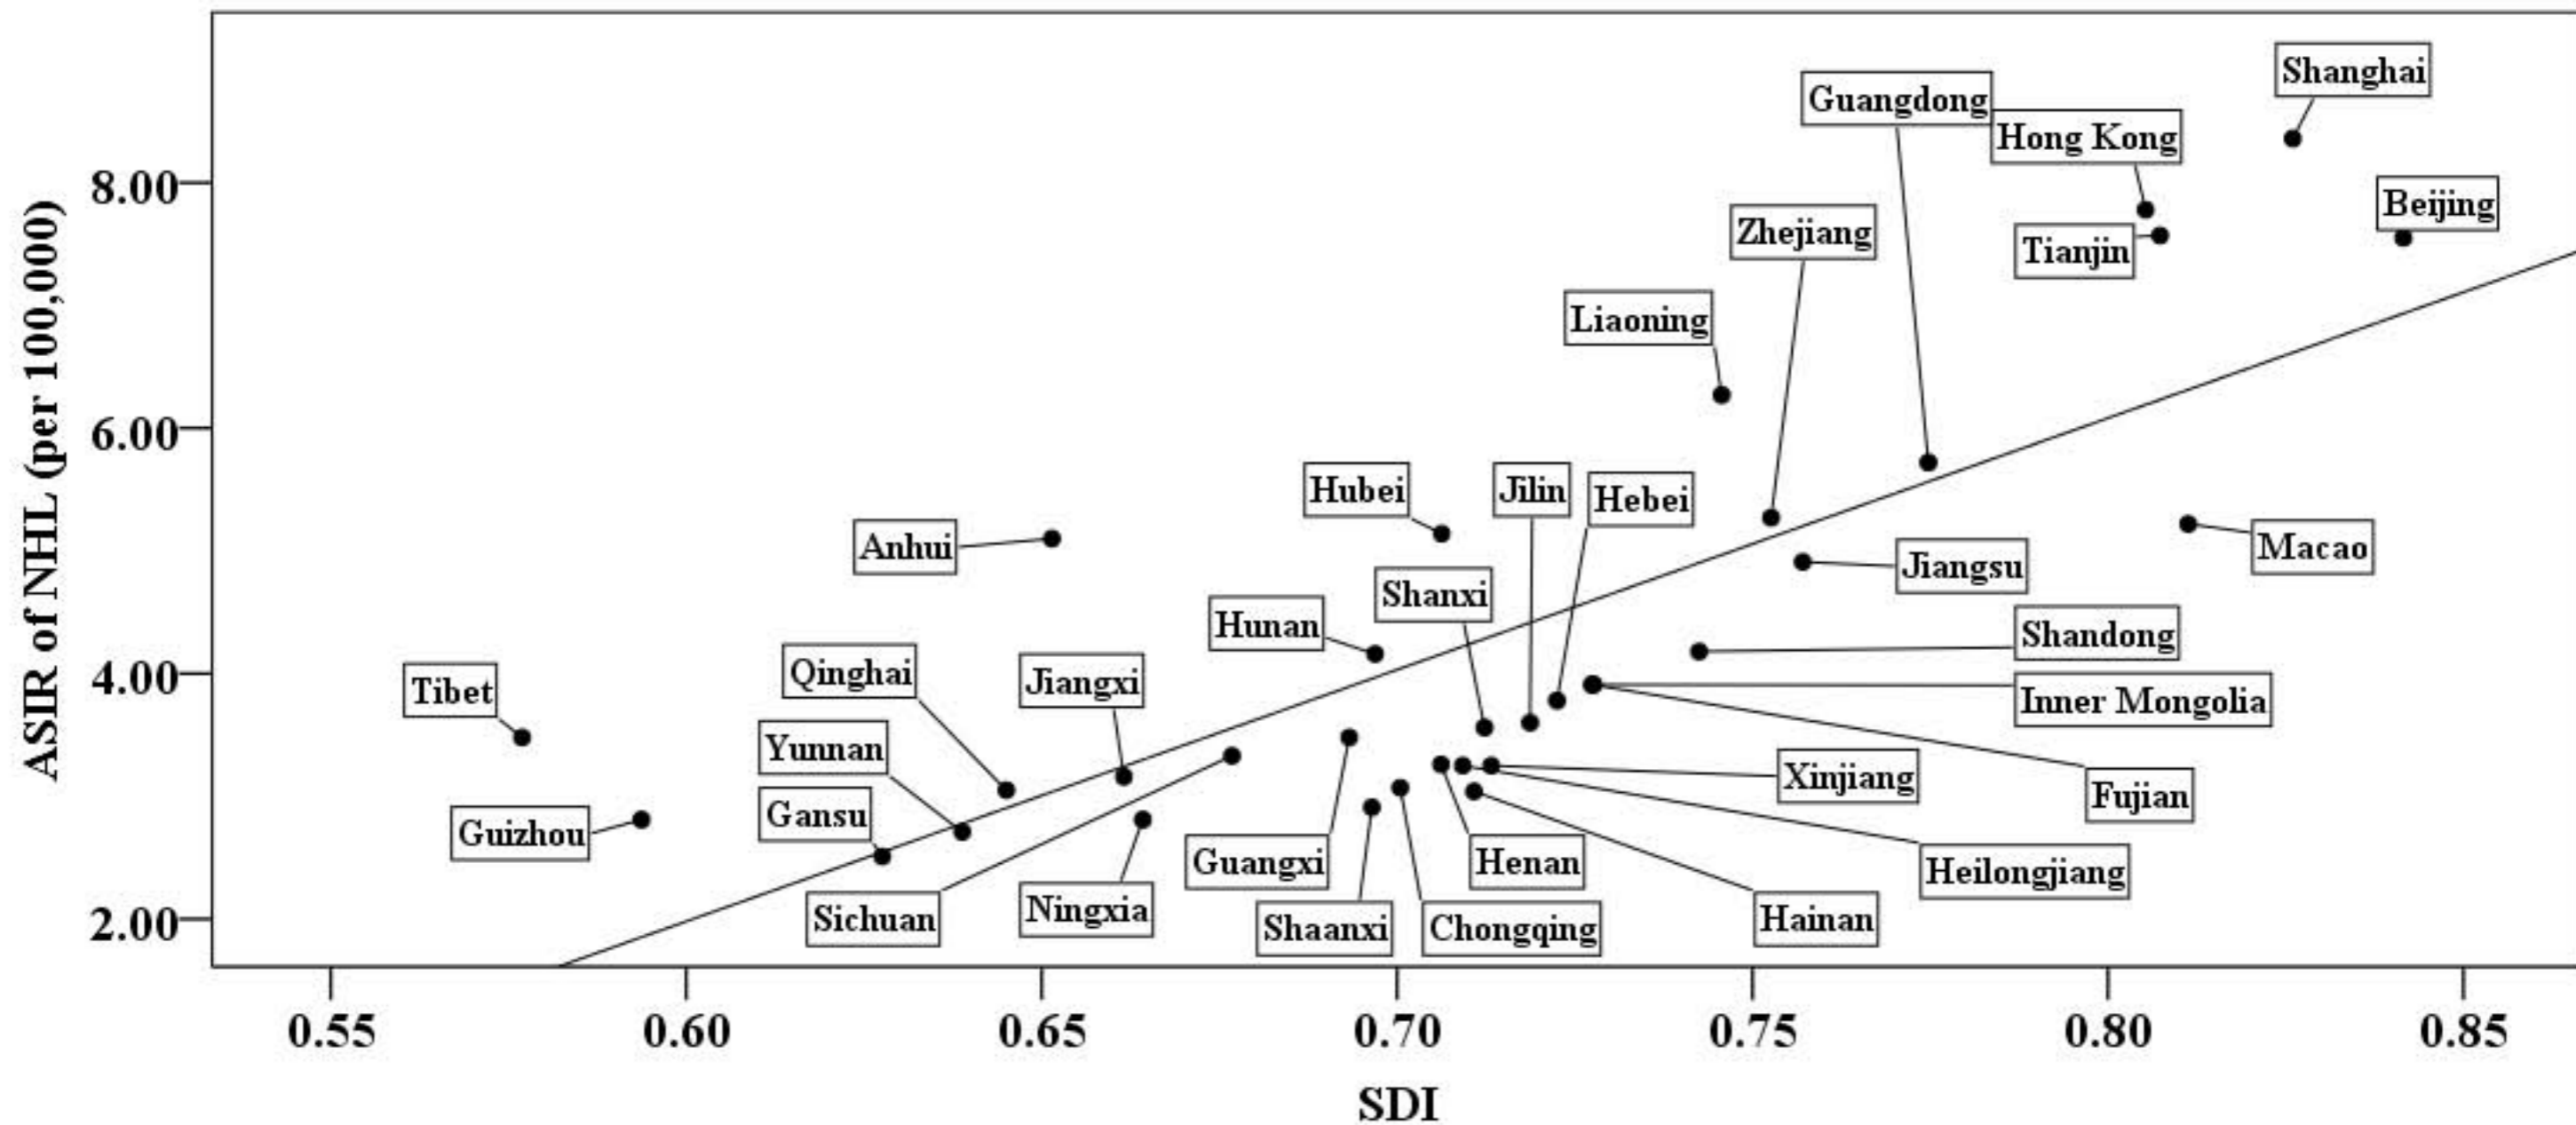

(E)

ASMR of NHL (per 100,000)

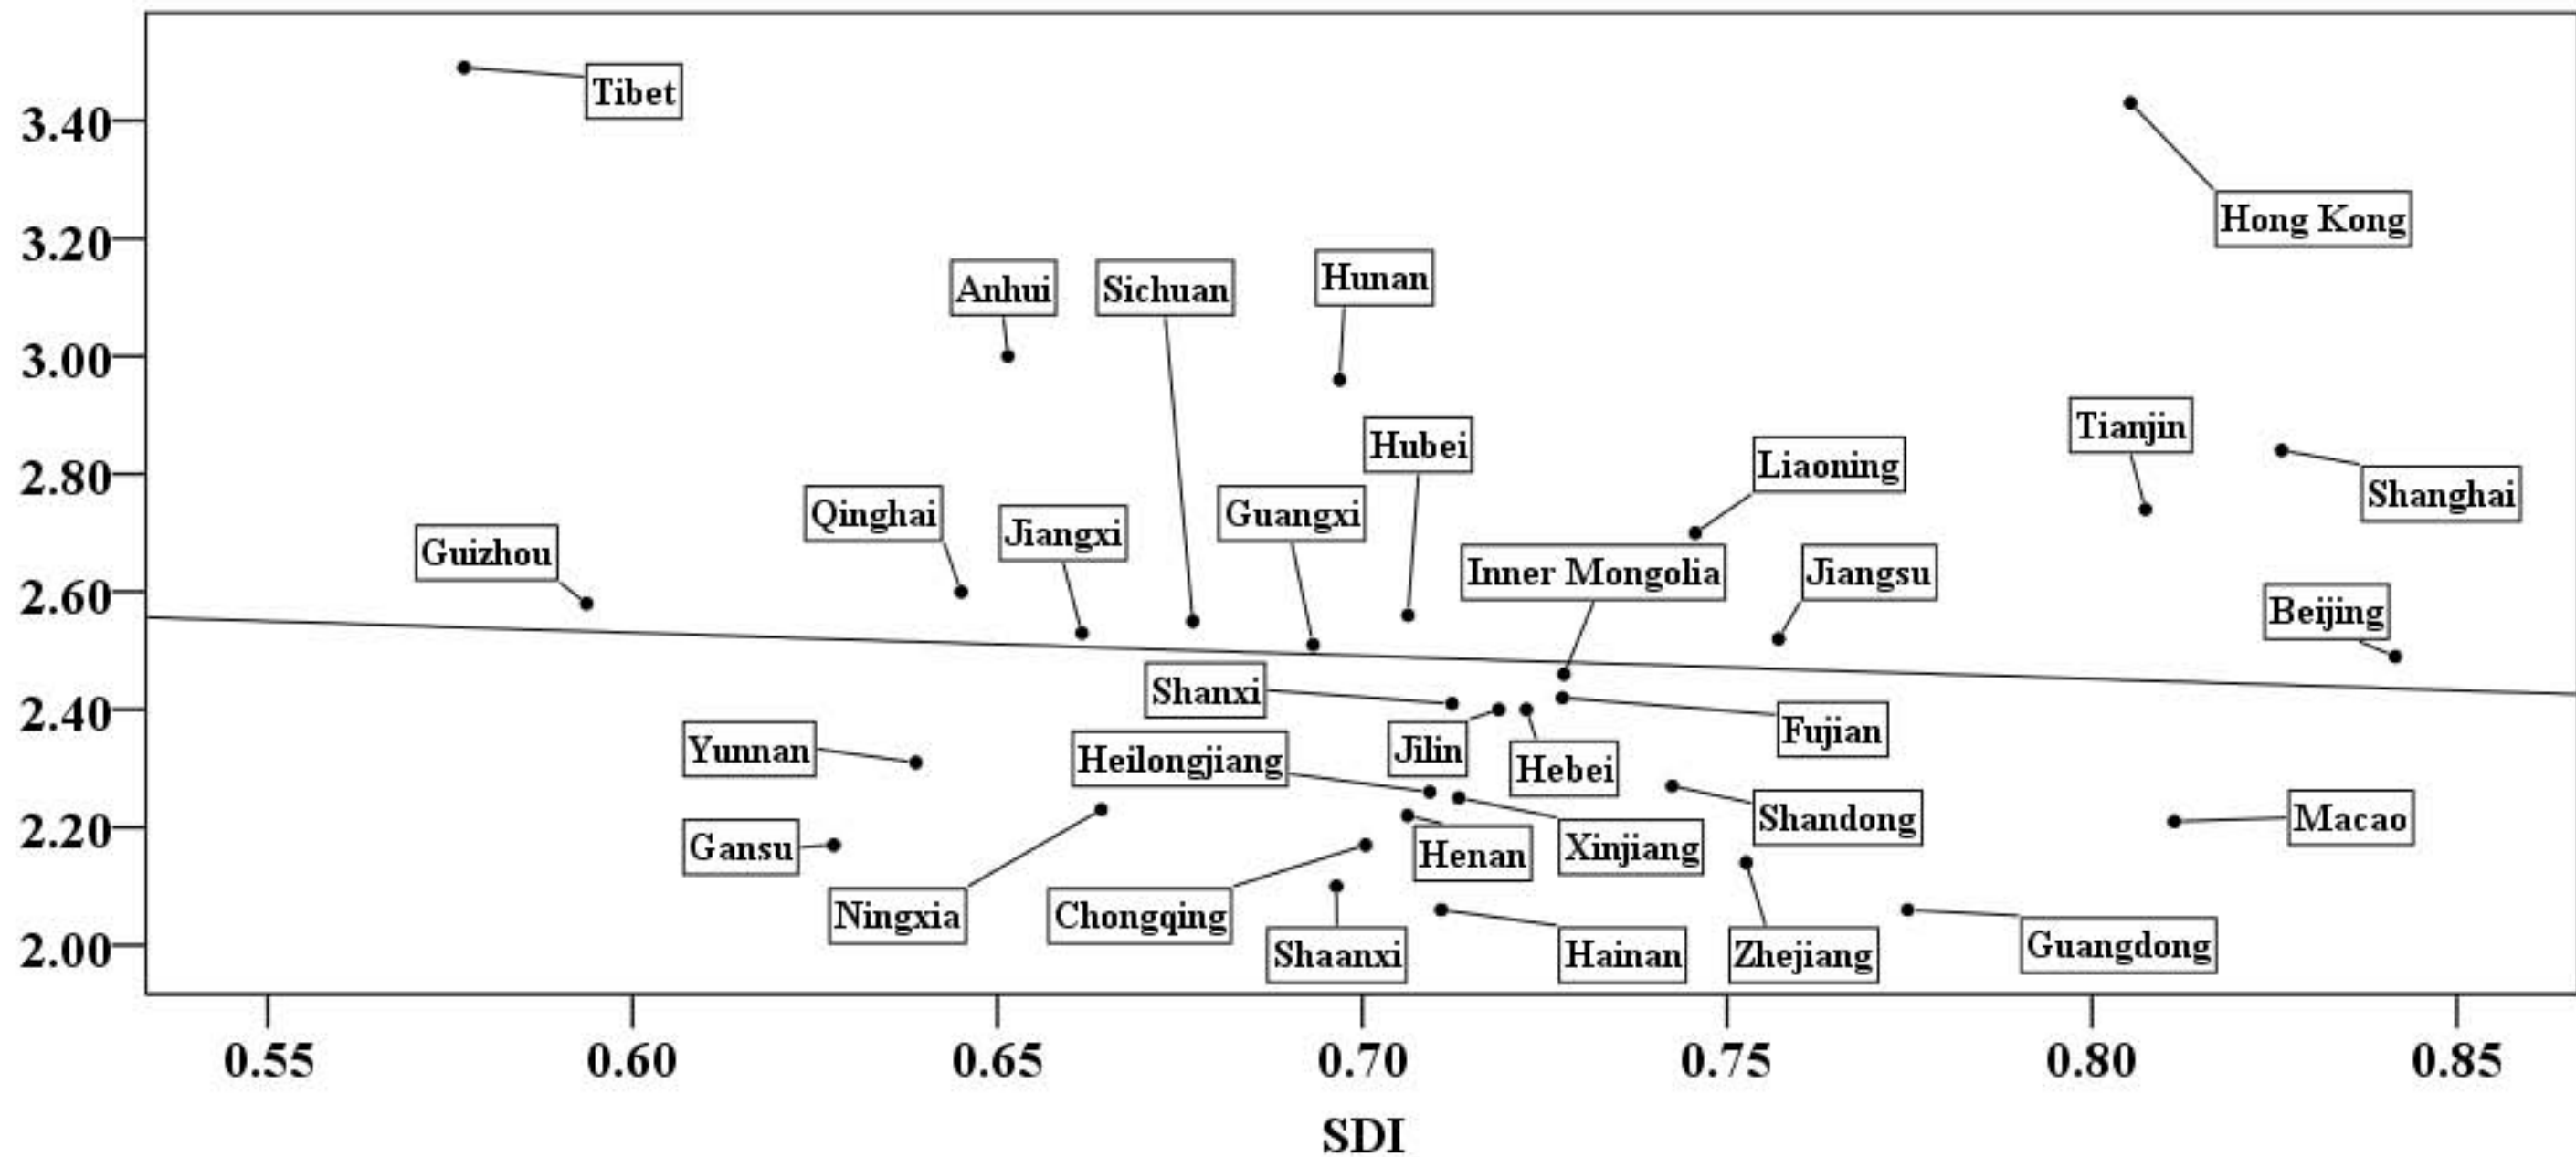

(F)



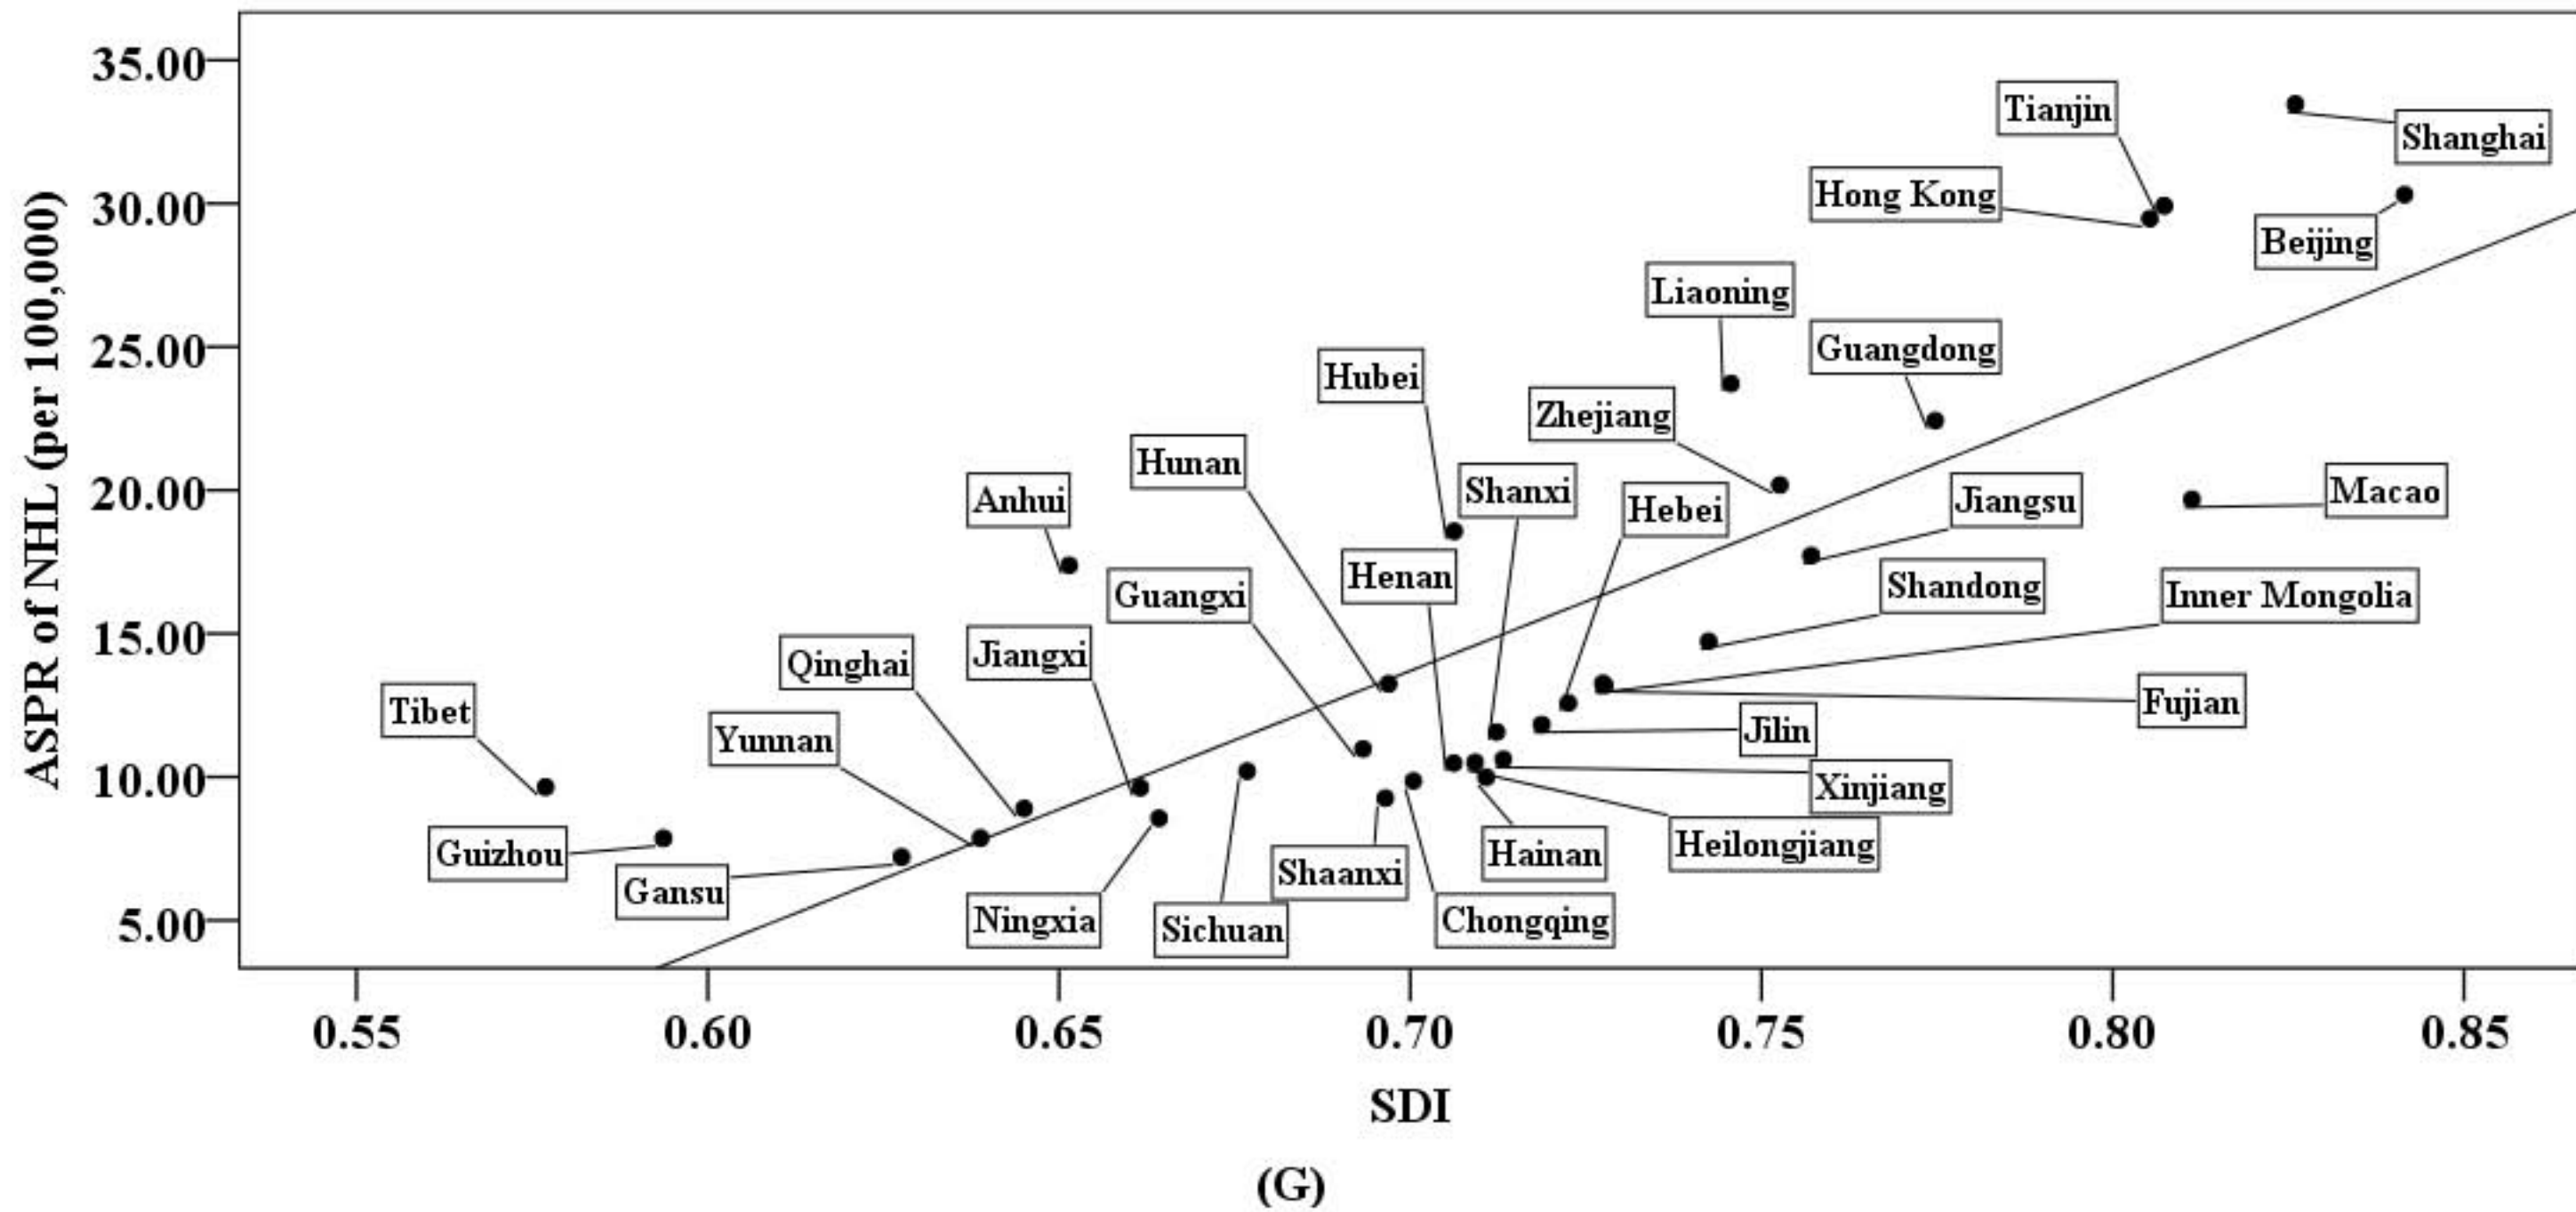

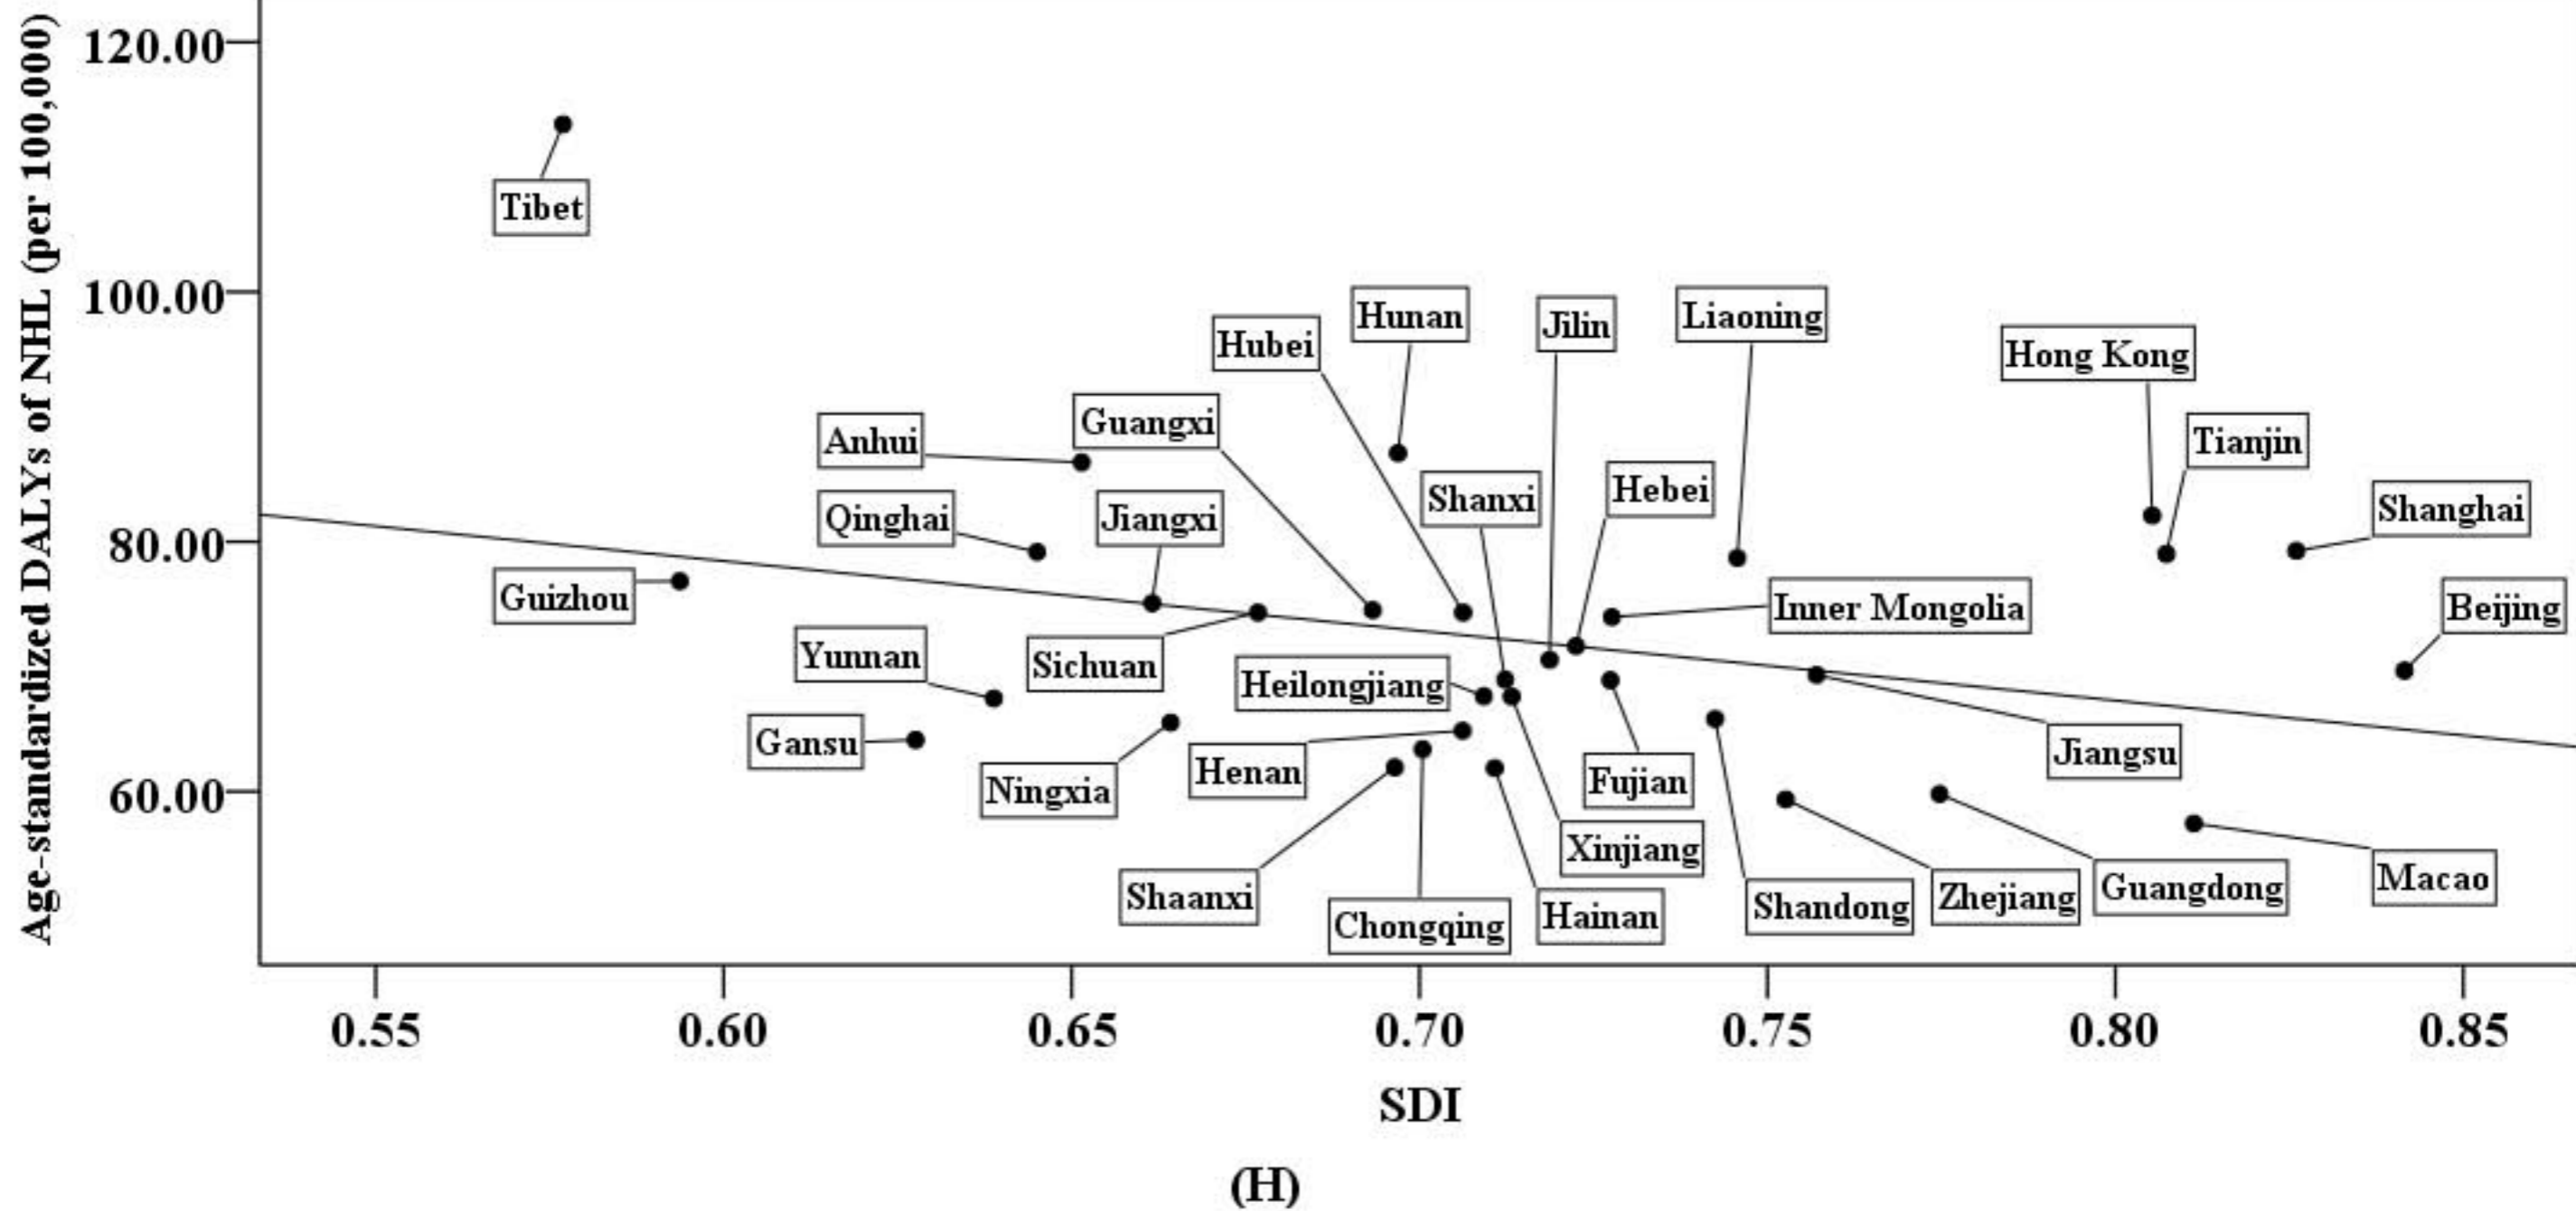

Figure S1. Relation between lymphoma burden and socio-demographic index (SDI) at provincial level (A) age-standardized incidence rate (ASIR) of Hodgkin lymphoma (HL) vs. SDI, (B) age-standardized mortality rate (ASMR) of HL vs. SDI, (C) age-standardized prevalence rate (ASPR) of HL vs. SDI, (D) age-standardized disability-adjusted life years (DALYs) of HL vs. SDI, (E) ASIR of non-Hodgkin lymphoma (NHL) vs. SDI, (F) ASMR of NHL vs. SDI, (G) ASPR of NHL vs. SDI, (H) age-standardized DALYs of NHL vs. SDI
